# Supplementary material for: A facile synthesis of a solvent-dispersible magnetically recoverable Pd0 catalyst for the C–C coupling reaction
Source: Royal Society of Chemistry journal article supplement (doi:10.1039/c6ra11674d), 2016-01-01
Supplement: c6ra11674d1.pdf [file c6ra11674d1.pdf]

## A facile synthesis of solvent-dispersible magnetically recoverable Pd<sup>0</sup> catalyst for C-C coupling reaction

Li Wu<sup>abc</sup>, Bin Yuan<sup>c</sup>, Mengmeng Liu<sup>c</sup>, Hongfei Huo<sup>c</sup>, Yu Long<sup>c</sup>, Jiantai Ma<sup>\*c</sup>, Gongxuan Lu<sup>\*a</sup>

Biphenyl. <sup>1</sup>H NMR (CDCl<sub>3</sub>, 400 MHz, 25 °C) **Table 2, entry 1, 12, 18**  
δ 7.343 (t, 2H, J<sub>HH</sub>=7.2 Hz), 7.439 (t, 4H, J<sub>HH</sub>=7.6 Hz), 7.594 (d, 4H, J<sub>HH</sub>=4.0 Hz)

4-methyl-biphenyl. <sup>1</sup>H NMR (CDCl<sub>3</sub>, 400 MHz, 25 °C) **Table 2, entry 2, 5**  
δ 2.376 (s, 3H, CH<sub>3</sub>), 7.230 (d, 2H, J<sub>HH</sub>=4.0 Hz), 7.302 (t, 1H, J<sub>HH</sub>=7.2 Hz), 7.405 (t, 2H, J<sub>HH</sub>=7.6 Hz), 7.468 (t, 2H, J<sub>HH</sub>=9.6 Hz), 7.564 (d, 2H, J<sub>HH</sub>=4.0 Hz)

4,4'-dimethyl-biphenyl. <sup>1</sup>H NMR (CDCl<sub>3</sub>, 400 MHz, 25 °C) **Table 2, entry 3, 14**  
δ 2.381 (s, 6H), 7.229 (d, J<sub>HH</sub>=7.6 Hz, 4H), 7.473(d, J<sub>HH</sub>=8.0 Hz, 4H)

4-acetyl-biphenyl <sup>1</sup>H NMR (CDCl<sub>3</sub>, 400 MHz, 25 °C) **Table 2, entry 4, 13**  
2.19 (s, 3H) 7.405 (t, 1H, J<sub>HH</sub>=7.2 Hz), 7.478 (t, 2H, J<sub>HH</sub>=7.6 Hz), 7.633 (d, 2H, J<sub>HH</sub>=3.6 Hz), 7.689 (d, 2H, J<sub>HH</sub>=4.0 Hz), 8.037 (d, 2H, J<sub>HH</sub>=4.0 Hz)

4-Hydroxy -biphenyl <sup>1</sup>H NMR (CDCl<sub>3</sub>, 400 MHz, 25 °C) **Table 2, entry 6**  
4.75 (s, 1H) , 6.91 (d, J = 8.4Hz, 2H), 7.33-7.30 (m, 1H), 7.42 (t, J = 7.6Hz, 2H), 7.49 (d, J = 7.6Hz, 2H), δ = 7.57-7.54(m, 2H)

4-Nitro-biphenyl. <sup>1</sup>H NMR ((CD<sub>3</sub>)<sub>2</sub>SO, 400 MHz, 25 °C) **Table 2, entry 7, 11**  
δ 6.849 (d, 1H, J<sub>HH</sub>=8.8 Hz), 7.268 (t, 2H, J<sub>HH</sub>=7.6Hz), 7.402 (t, 2H, J<sub>HH</sub>=7.8 Hz), 7.478 (d, 2H, J<sub>HH</sub>=8.4 Hz), 7.566 (d, 2H, J<sub>HH</sub>=7.6 Hz)

4-methyl-4'-nitro-biphenyl. <sup>1</sup>H NMR ((CD<sub>3</sub>)<sub>2</sub>SO, 400 MHz, 25 °C) **Table 2, entry 8, 16**  
δ 2.365 (s, 3H, CH<sub>3</sub>), 7.336 (d, 2H, J<sub>HH</sub>=4.0 Hz), 7.685 (d, 2H, J<sub>HH</sub>=3.6 Hz), 7.928 (d, 2H, J<sub>HH</sub>=4.0 Hz), 8.275 (d, 2H, J<sub>HH</sub>=4.0 Hz)

4-Cyanobiphenyl <sup>1</sup>H NMR (CDCl<sub>3</sub>, 400 MHz, 25 °C) **Table 2, entry 9**  
δ = 7.49-7.40 (m, 4H), 7.59-7.55 (m, 1H), 7.69 (q, J = 8.8Hz, 4H)

N-Acetyl-4-aminobiphenyl .<sup>1</sup>H NMR (400 MHz, CDCl<sub>3</sub>, 25 °C) **Table 2, entry 10**  
δ = 2.19 (s, 3H), 7.34-7.30 (m, 1H), 7.41 (t, J = 7.6Hz, 2H), 7.59-7.52 (m, 6H), 7.66 (s, 1H)

4-Chloro-4'-methoxybiphenyl .<sup>1</sup>H NMR (CDCl<sub>3</sub>, 400 MHz, 25 °C) **Table 2, entry 15**  
δ = 3.86 (s, 3H), 6.93 (d, J = 8.8 Hz, 2H), 7.41-7.36 (m, 2H), 7.52-7.50 (m, 4H)

4-Chloridebiphenyl .<sup>1</sup>H NMR (CDCl<sub>3</sub>, 400 MHz, 25 °C) **Table 2, entry 17, 18**  
δ 7.49-7.37 (m, 5H) , 7.57-7.51 (m, 4H),

4-Methoxybiphenyl.  $^1\text{H NMR}$  ( $\text{CDCl}_3$ , 400 MHz,  $25^\circ\text{C}$ ) **Table 2, entry 19**  
 $\delta = 3.85$  (s, 3H),  $6.98$  (d,  $J = 7.2$  Hz, 2H),  $7.30$  (t,  $J = 7.6$  Hz, 1H),  $7.41$  (t,  $J = 7.6$  Hz, 2H),  $7.56$ - $7.51$  (m, 4H)

(E)-Stilbene  $^1\text{H NMR}$  ( $\text{CDCl}_3$ , 400 MHz,  $25^\circ\text{C}$ ) **Table 3, entry 1,5**  
 $\delta 7.60$  (d,  $J=1.0$  Hz, 4H),  $\delta 7.43$  (t,  $J=7.5$  Hz, 4H),  $\delta 7.32$  (t,  $J=7.2$  Hz, 2H),  $\delta 7.19$  (s, 2H).

4-Methylstilbene  $^1\text{H NMR}$  ( $\text{CDCl}_3$ , 400 MHz,  $25^\circ\text{C}$ ) **Table 3, entry 2,6**  
 $\delta 7.48$  (d,  $J=7.6$  Hz, 2H),  $\delta 7.40$  (d,  $J=8.0$  Hz, 2H),  $\delta 7.33$  (t,  $J=8.0$  Hz, 2H),  $\delta 7.23$  (t,  $J=7.2$  Hz, 1H),  $\delta 7.15$  (d,  $J=8.0$  Hz, 2H),  $\delta 7.06$  (d,  $J=2.4$  Hz, 1H),  $\delta 2.34$  (s, 3H).

4-Methoxystilbene  $^1\text{H NMR}$  ( $\text{CDCl}_3$ , 400 MHz,  $25^\circ\text{C}$ ) **Table 3, entry 3,7**  
 $\delta 7.36$  (d,  $J=7.4$  Hz, 2H),  $\delta 7.33$  (d,  $J=8.7$  Hz, 2H),  $\delta 7.24$  (m, 1H),  $\delta 6.94$  (d,  $J=16.3$  Hz, 1H),  $\delta 6.84$  (d,  $J=16.3$  Hz, 1H),  $\delta 6.76$  (d,  $J=8.7$  Hz, 2H),  $\delta 3.71$  (s, 3H).

4-Acetylstilbene  $^1\text{H NMR}$  ( $\text{CDCl}_3$ , 400 MHz,  $25^\circ\text{C}$ ) **Table 3, entry 4,8**  
 $\delta 7.90$  (d,  $J=8.4$  Hz, 2H),  $\delta 7.53$  (d,  $J=8.4$  Hz, 2H),  $\delta 7.48$  (m, 2H),  $\delta 7.35$  (m, 2H),  $\delta 7.28$  (m, 1H),  $\delta 7.17$  (d,  $J=16.3$  Hz, 1H),  $\delta 7.07$  (d,  $J=16.3$  Hz, 1H),  $\delta 2.55$  (s, 3H)

n-Butylbenzene  $^1\text{H NMR}$  ( $\text{CDCl}_3$ , 400 MHz,  $25^\circ\text{C}$ ) **Table 4, entry 1,4**  
 $\delta = 7.27$  (t,  $J = 6.7$  Hz, 2H),  $7.21$ - $7.18$  (m, 3H),  $2.59$  (t,  $J = 7.6$  Hz, 2H),  $1.66$ - $1.50$  (m, 2H),  $1.38$ - $1.21$  (m, 2H),  $0.86$  (t,  $J = 6.5$  Hz, 3H).

n-Butyl-4-methylbenzene  $^1\text{H NMR}$  ( $\text{CDCl}_3$ , 400 MHz,  $25^\circ\text{C}$ ) **Table 4, entry 2,6**  
 $\delta = 7.10$  (s, 4H),  $2.60$  (t,  $J = 7.7$  Hz, 2H),  $2.33$  (s, 3H),  $1.65$ - $1.53$  (m, 2H),  $1.44$ - $1.25$  (m, 2H),  $0.94$  (t,  $J = 6.6$  Hz, 3H)

4-(n-Butyl)acetophenone  $^1\text{H NMR}$  ( $\text{CDCl}_3$ , 400 MHz,  $25^\circ\text{C}$ ) **Table 4, entry 3**  
 $7.87$  (d, 2 H,  $J = 8.0$  Hz),  $7.26$  (d, 2 H,  $J = 8.0$  Hz),  $2.67$  (t, 2 H,  $J = 7.5$  Hz),  $2.58$  (s, 3 H),  $1.58$ - $1.64$  (m, 2 H),  $1.33$ - $1.38$  (m, 2 H),  $0.93$  (t, 3 H,  $J = 7.0$  Hz)

4-(n-Butyl)benzotrile  $^1\text{H NMR}$  ( $\text{CDCl}_3$ , 400 MHz,  $25^\circ\text{C}$ ) **Table 4, entry 5**  
 $7.27$  (d, 2 H,  $J = 8.0$  Hz),  $7.56$  (d, 2 H,  $J = 8.0$  Hz),  $2.66$  (t, 2 H,  $J = 7.5$  Hz),  $1.60$  (m, 2 H),  $1.35$  (m, 2 H),  $0.95$  (t, 3 H,  $J = 7.5$  Hz)
